# Supplementary material for: A CD22-reactive TCR from the T-cell allorepertoire for the treatment of acute lymphoblastic leukemia by TCR gene transfer
Source: PubMed Central journal article supplement (PMC5342099; doi:10.18632/oncotarget.12247), 2016-09-26
Supplement: oncotarget-07-71536-s001.pdf [file oncotarget-07-71536-s001.pdf]

# A CD22-reactive TCR from the T-cell allorepertoire for the treatment of acute lymphoblastic leukemia by TCR gene transfer

## Supplementary Materials

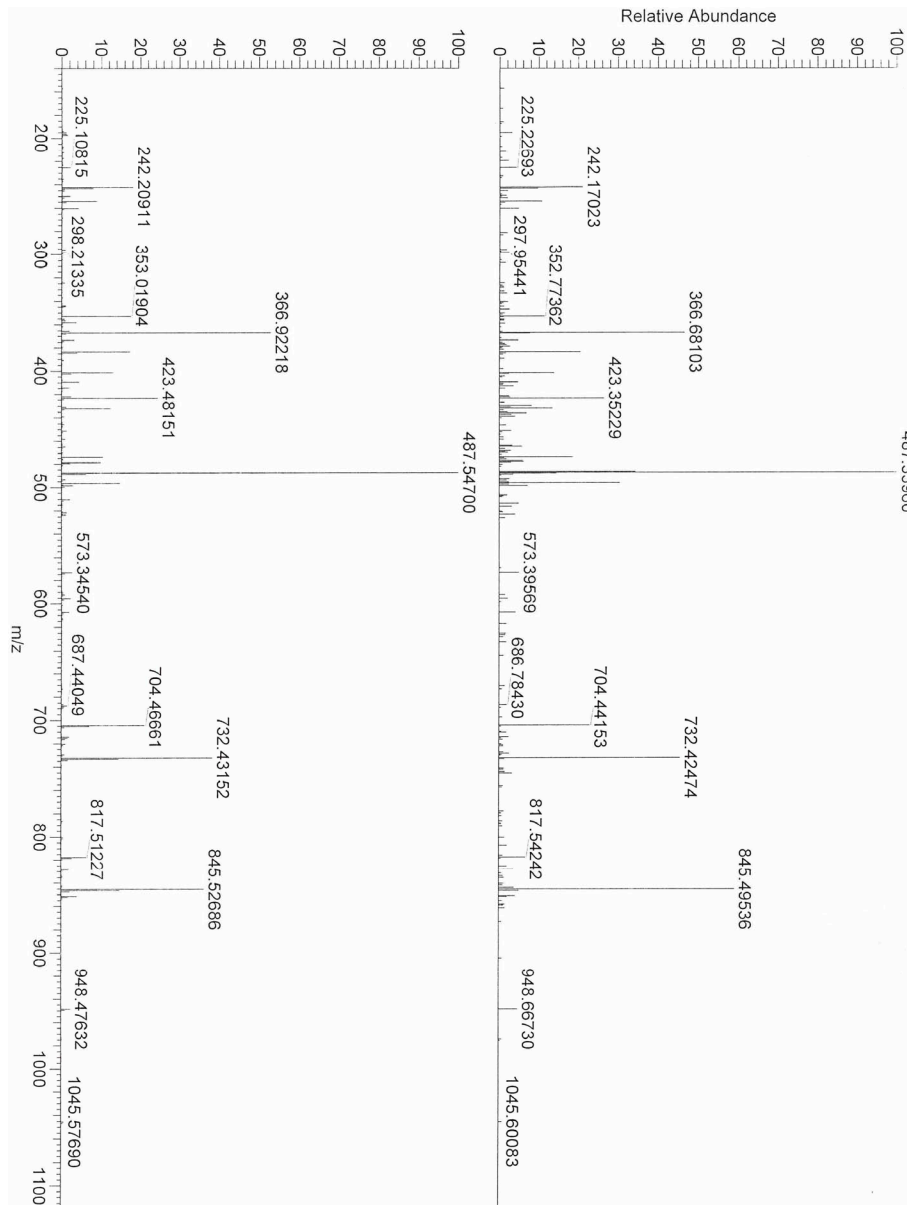

**Supplementary Figure S1: Matching tandem mass spectra of synthesized and eluted CD22-derived peptide RPFPPHIQL (CD22<sub>RPF</sub>).** Shown are tandem mass spectra of the eluted (top) and synthesized (bottom) peptide.

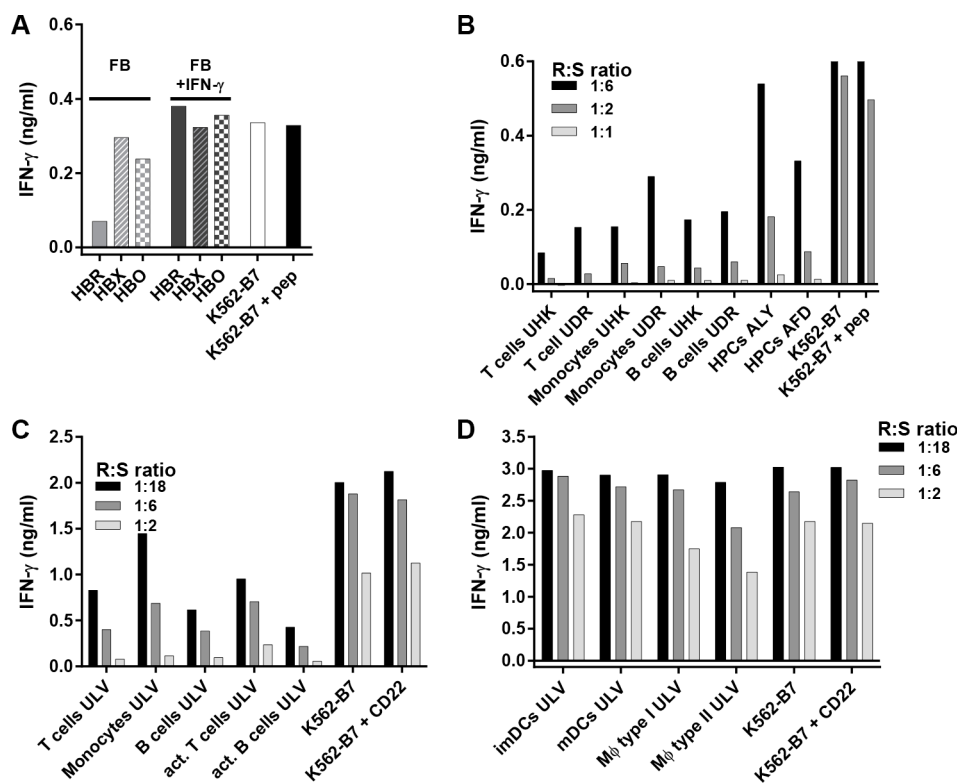

**Supplementary Figure S2: Recognition of stimulator cells by control T-cell clone CTZ.** Control T-cell clone CTZ recognizing a ubiquitously expressed antigen presented in HLA-B7 was used to test the stimulatory capacity of used cell samples. (A–C) The same stimulator cells as in Figure 3A–3C, respectively, were cocultured with clone CTZ. (D) The stimulatory capacity of cells used in Figure 4A was tested using clone CTZ.

**Supplementary Table S1: HLA typing of B-LCL panel used in this study (Adapted from van Loenen *et al.* [25])**

| B-LCL | HLA class I |        |        | HLA class II |      |                  |
|-------|-------------|--------|--------|--------------|------|------------------|
|       | A           | B      | C      | DR           | DQ   | DP               |
| NGZ   | 11, 24      | 53, 61 | 2      | 1, 11        | 5, 7 | 1*0201, 1*0301   |
| LMB   | 29          | 44, 51 | 14, 16 | 7, 8         | 2, 4 | 1*0401, 1*110101 |
| MWX   | 1, 34       | 15, 35 | 4, 12  | 1, 15        | 5, 6 | 1*0601, 1*1301   |
| ABV   | 3, 29       | 7, 44  | 7      | 7, 14        | 5, 2 | 1*0401, 1*1101   |
| UKL*  | 1, 30       | 8, 13  | 6, 7   | 4, 17        | 2, 7 | 1*0401           |
| AKB   | 1, 2        | 37, 39 | 6, 7   | 1, 10        | 5    | 2*0102, 1*0401   |
| RBB*  | 2, 26       | 8, 27  | 1, 7   | 17, 52       | 2    | 1*0401           |
| IZA   | 2, 24       | 8, 60  | 3, 7   | 13, 17       | 2, 6 | 1*0401, 1*1401   |
| NGI   | 11, 24      | 8, 39  | 7      | 17, 8        | 2, 4 | 1*0101, 1*1401   |
| AHT   | 24, 25      | 55, 62 | 3      | 8, 15        | 5, 6 | 1*0401           |
| MHX   | 1, 0205     | 18, 50 | 6, 7   | 7, 9         | 2, 9 | 1*0201, 1*0301   |
| CVV   | 11, 31      | 57, 62 | 3, 6   | 4, 7         | 7, 9 | 1*0201, 1*0401   |
| UCE*  | 3, 11       | 7, 27  | 2, 7   | 11, 14       | 5, 7 | 1*0201, 1*1601   |
| MBX   | 1           | 8, 63  | 7      | 12, 17       | 2, 7 | 1*0101, 1*0401   |
| EBM   | 23          | 64     | 8      | 4            | 8    | 1*0201           |
| FAQ   | 23, 68      | 14, 38 | 8, 12  | 13           | 7, 6 | 1*0201           |
| LSR   | 32, 68      | 35, 52 | 12     | 15, 16       | 5, 6 | 1*0401, 1*1401   |
| GGT   | 26, 31      | 14, 49 | 7, 8   | 1, 7         | 2, 5 | 1*0402, 1*110101 |

\*B-LCL not used in previous study and added in this panel.
